# Supplementary material for: α-LiMB9O15 (M = Sr, Pb): flexible [B3O7] units leading to the low temperature phase of β-LiMB9O15 (M = Sr, Pb)
Source: Royal Society of Chemistry journal article supplement (doi:10.1039/d2qi01208a), 2022-01-01
Supplement: d2qi01208a1.pdf [file d2qi01208a1.pdf]

## Electronic Supplementary Information

$\alpha$ -LiMB<sub>9</sub>O<sub>15</sub> (M = Sr, Pb): Flexible [B<sub>3</sub>O<sub>7</sub>] Units Leading to the Low

Temperatures Phase of  $\beta$ -LiMB<sub>9</sub>O<sub>15</sub> (M = Sr, Pb)

Kaitong Liu,<sup>a, b</sup> Jian Han,<sup>\*, a, b</sup> Fuming Li,<sup>a, b</sup> Shujuan Han,<sup>a, b</sup> Zihua Yang,<sup>a, b</sup> Xuping Wang,<sup>\*, a</sup> and Shilie Pan<sup>\*, a, b</sup>

<sup>a</sup> CAS Key Laboratory of Functional Materials and Devices for Special Environments, Xinjiang Technical Institute of Physics & Chemistry, CAS; Xinjiang Key Laboratory of Electronic Information Materials and Devices, 40-1 South Beijing Road, Urumqi 830011, China.

<sup>b</sup> Center of Materials Science and Optoelectronics Engineering, University of Chinese Academy of Sciences, Beijing 100049, China

\* Corresponding authors: hanjian@ms.xjb.ac.cn, wangxp@sdas.org, slpan@ms.xjb.ac.cn.

## 2. Experimental Section

### 2.1 Synthesis.

$\alpha$ -LiSrB<sub>9</sub>O<sub>15</sub> polycrystalline powders were prepared by solid-state reaction. The stoichiometric ratio of Li<sub>2</sub>CO<sub>3</sub>, SrCO<sub>3</sub>, and H<sub>3</sub>BO<sub>3</sub> were weighed and ground evenly. The evenly ground mixture was slowly heated from room temperature to 450 °C and held for 10 hours, then slowly heated to 770 °C and held at this temperature for 7 days. During the holding period, the mixture was ground several times. The purity of the polycrystalline powders was determined by powder XRD tests. Millimeter-sized single crystal of  $\alpha$ -LiMB<sub>9</sub>O<sub>15</sub> (M=Sr, Pb) was obtained by the high-temperature melt method. For  $\alpha$ -LiSrB<sub>9</sub>O<sub>15</sub>, it is obtained under a closed system. The reagents of LiF, SrF<sub>2</sub>, and B<sub>2</sub>O<sub>3</sub> were weighed with a molar ratio of 4:2:7. These raw materials were mixed thoroughly and loaded into the quartz tube. The tube was sealed at the vacuum degree of 10<sup>-3</sup> Pa and then placed in the Muffle furnace. It was slowly heated to 600 °C and held for 10 hours, and cooled to 500 °C at the rate of 1 °C/h. Then it was decreased to 400 °C at 2 °C/h and finally cooled rapidly to 30 °C. Finally, small transparent grains were obtained. For  $\alpha$ -LiPbB<sub>9</sub>O<sub>15</sub>, the molar ratio of LiF, PbF<sub>2</sub>, and B<sub>2</sub>O<sub>3</sub> is 3:1:15. The platinum crucible was placed in a temperature-controlled single crystal furnace and heated to 630 °C at a rate of 100 °C /h. At this time, all the solid reactants were melted. After holding 10 h at this temperature, the temperature was cooled to 530 °C at a rate of 2 °C /h. It was then lowered to room temperature at a rate of 10 °C/h, and the colorless crystals were obtained. Unfortunately, the polycrystalline of  $\alpha$ -LiPbB<sub>9</sub>O<sub>15</sub> can not be obtained by changing experimental strategies.

### 2.2 Structural Characterization.

The resulting millimeter-sized single crystals were used for data collection, single-crystal diffraction data of  $\alpha$ -LiMB<sub>9</sub>O<sub>15</sub> (M=Sr, Pb) were collected on a Bruker D8 Venture diffractometer using monochromatic Mo K $\alpha$  radiation at room temperature. The initial crystal structures were solved by the direct method and then refined with anisotropic displacement parameters for all atoms using the SHELXTL program package.<sup>1</sup> The structures were verified by PLATON and no higher symmetry elements were found.<sup>2</sup> Crystal data and structure refinement information are given in **Table 1**. The final refined atomic positions, isotropic thermal parameters, and bond valence sum (BVS) calculations of the atoms are summarized in **Tables S1, S2**. Selected bond distances (Å) and angles (deg) are listed in **Tables S3, S4**.

### 2.3 Powder X-ray Diffraction.

Powder XRD patterns were used to test the purity of the polycrystalline. An automated Bruker D2 Phaser X-ray diffractometer equipped with a diffracted beam monochromator set for Cu K $\alpha$  radiation ( $\lambda = 1.5418$  Å) was used at room temperature in the angular range of  $2\theta = 10$ -70 ° with a scan step width of 0.02 ° and a fixed counting time of 1 s/step.

### 2.4 Infrared Spectroscopy.

Infrared spectroscopy was carried out on a Shimadzu IR Affinity-1 Fourier transform infrared spectrometer with a resolution of 2 cm<sup>-1</sup> in the 400-4000 cm<sup>-1</sup> range at room temperature. KBr was used as the reference pellet and the samples were

mixed thoroughly with it.

### **2.5 UV–Vis–NIR Diffuse Reflectance Spectroscopy.**

UV–vis–NIR diffuse-reflectance spectroscopy data in the wavelength range of 180–1600 nm was recorded at room temperature using a powder sample on a Shimadzu SolidSpec-3700 DUV spectrophotometer.

### **2.6 Thermal Analyses.**

Thermal gravimetric analysis (TGA) and differential scanning calorimetry (DSC) were carried out on a simultaneous NETZSCH STA 449 F3 thermal analyzer instrument in a flowing N<sub>2</sub> atmosphere.

### **2.7 Computational Methods.**

The first-principles calculations were performed by the plane-wave pseudopotential method implemented in the CASTEP software package.<sup>3</sup> The exchange-correlation potential was calculated using Perdew-Burke-Ernzerhof (PBE) functional within the generalized gradient approximation (GGA).<sup>4</sup> To achieve energy convergence, the kinetic energy cutoff of 820 and 940 eV for  $\alpha$ -LiMB<sub>9</sub>O<sub>15</sub> (M=Sr, Pb) within normal-conserving pseudopotential (NCP) was adopted, respectively.<sup>5-6</sup> The Monkhorst–Pack *k*-point meshes in the Brillouin zone were set as 3 × 3 × 4 and 4 × 4 × 4 for  $\alpha$ -LiMB<sub>9</sub>O<sub>15</sub> (M=Sr, Pb), respectively. Based on the band structure, the linear optical refractive indices and birefringence can be obtained by the real part of the dielectric function.

**Table S1.** Atomic coordinates ( $\times 10^4$ ), equivalent isotropic displacement parameters ( $\text{\AA}^2 \times 10^3$ ), and BVS of each atom for  $\alpha$ -LiSrB<sub>9</sub>O<sub>15</sub>.  $U(\text{eq})$  is defined as one-third of the trace of the orthogonalized  $U_{ij}$  tensor.

| Atoms | x        | y        | z       | $U(\text{eq})$ | BVS  |
|-------|----------|----------|---------|----------------|------|
| Li(1) | 4921(11) | 2410(20) | 4997(7) | 20(2)          | 1.16 |
| Sr(1) | 7402(1)  | 7482(1)  | 6582(1) | 15(1)          | 2.10 |
| B(1)  | 2443(8)  | 4746(6)  | 5331(4) | 13(1)          | 3.05 |
| B(2)  | 546(8)   | 6799(8)  | 5250(4) | 14(1)          | 3.03 |
| B(3)  | 72(7)    | 9645(8)  | 5288(5) | 13(1)          | 3.12 |
| B(4)  | 2361(8)  | 10862(7) | 6038(4) | 14(1)          | 3.01 |
| B(5)  | 234(8)   | 9991(8)  | 6969(5) | 15(1)          | 3.03 |
| B(6)  | -74(7)   | 9518(8)  | 8701(4) | 14(1)          | 3.08 |
| B(7)  | 2703(8)  | 8264(7)  | 8668(4) | 14(1)          | 2.98 |
| B(8)  | 4844(7)  | 6395(7)  | 8367(5) | 13(1)          | 3.13 |
| B(9)  | 4776(7)  | 9005(7)  | 7656(4) | 10(1)          | 2.99 |
| O(1)  | 3956(4)  | 4377(4)  | 5217(3) | 12(1)          | 2.12 |
| O(2)  | 1457(4)  | 3884(4)  | 5849(3) | 11(1)          | 1.97 |
| O(3)  | 1880(5)  | 6083(5)  | 4928(3) | 18(1)          | 2.20 |
| O(4)  | 240(5)   | 8156(5)  | 4848(3) | 17(1)          | 2.02 |
| O(5)  | -297(5)  | 6104(5)  | 5931(3) | 17(1)          | 2.03 |
| O(6)  | 1534(5)  | 10501(5) | 5287(3) | 15(1)          | 1.95 |
| O(7)  | 3906(4)  | 11154(5) | 5949(3) | 15(1)          | 2.03 |
| O(8)  | 1632(5)  | 10808(5) | 6883(3) | 17(1)          | 2.01 |
| O(9)  | -486(5)  | 9415(5)  | 6215(3) | 16(1)          | 2.10 |
| O(10) | -438(5)  | 9632(5)  | 7756(3) | 19(1)          | 1.98 |
| O(11) | 1191(4)  | 8429(5)  | 8894(3) | 14(1)          | 2.08 |
| O(12) | 3480(5)  | 9443(5)  | 8178(3) | 17(1)          | 1.98 |
| O(13) | 3489(5)  | 6934(4)  | 8870(2) | 12(1)          | 1.96 |
| O(14) | 5312(4)  | 7508(6)  | 7698(2) | 18(1)          | 2.25 |
| O(15) | 5527(5)  | 9915(5)  | 7063(3) | 17(1)          | 2.04 |

**Table S2.** Atomic coordinates ( $\times 10^4$ ), equivalent isotropic displacement parameters ( $\text{\AA}^2 \times 10^3$ ), and BVS of each atom for  $\alpha$ -LiPbB<sub>9</sub>O<sub>15</sub>.  $U(\text{eq})$  is defined as one-third of the trace of the orthogonalized  $U_{ij}$  tensor.

| Atoms | x       | y       | z        | $U(\text{eq})$ | BVS  |
|-------|---------|---------|----------|----------------|------|
| Li(1) | 10000   | 10000   | 9160(30) | 11(3)          | 1.23 |
| Pb(1) | 6667    | 3333    | 1807(1)  | 12(1)          | 1.70 |
| B(1)  | 6750(6) | 7654(6) | 9301(7)  | 11(1)          | 3.07 |
| B(2)  | 7847(6) | 7491(6) | 6596(6)  | 11(1)          | 3.10 |
| B(3)  | 5863(7) | 5356(7) | 4778(6)  | 12(1)          | 3.05 |
| O(1)  | 9199(4) | 7726(4) | 5714(3)  | 13(1)          | 2.00 |
| O(2)  | 7221(4) | 5479(4) | 3909(3)  | 12(1)          | 2.03 |
| O(3)  | 8056(4) | 8119(4) | 8076(3)  | 12(1)          | 2.13 |
| O(4)  | 6186(4) | 6483(4) | 6013(4)  | 16(1)          | 2.13 |
| O(5)  | 4196(4) | 4203(4) | 4498(4)  | 13(1)          | 1.90 |

**Table S3.** Selected bond lengths [Å] and angles [deg.] for  $\alpha$ -LiSrB<sub>9</sub>O<sub>15</sub>.

|                       |            |                     |            |
|-----------------------|------------|---------------------|------------|
| Li(1)-O(1)            | 1.917(18)  | B(3)-O(6)           | 1.451(7)   |
| Li(1)-O(2)#4          | 2.133(14)  | B(3)-O(9)           | 1.472(8)   |
| Li(1)-O(6)#1          | 2.311(16)  | B(4)-O(6)           | 1.357(7)   |
| Li(1)-O(7)#5          | 1.983(13)  | B(4)-O(7)           | 1.350(7)   |
| Li(1)-O(11)#2         | 2.029(12)  | B(4)-O(8)           | 1.404(7)   |
| Li(1)-O(13)#3         | 2.203(11)  | B(5)-O(8)           | 1.393(8)   |
| Sr(1)-O(3)#1          | 2.602(4)   | B(5)-O(9)           | 1.371(8)   |
| Sr(1)-O(4)#1          | 2.870(4)   | B(5)-O(10)          | 1.340(8)   |
| Sr(1)-O(5)#6          | 2.493(4)   | B(6)-O(2)#8         | 1.464(7)   |
| Sr(1)-O(8)#3          | 2.823(4)   | B(6)-O(5)#8         | 1.509(8)   |
| Sr(1)-O(9)#6          | 2.518(4)   | B(6)-O(10)          | 1.441(8)   |
| Sr(1)-O(12)#3         | 2.754(4)   | B(6)-O(11)          | 1.461(7)   |
| Sr(1)-O(14)           | 2.437(3)   | B(7)-O(11)          | 1.342(7)   |
| Sr(1)-O(15)           | 2.737(4)   | B(7)-O(12)          | 1.417(7)   |
| B(1)-O(1)             | 1.342(8)   | B(7)-O(13)          | 1.364(7)   |
| B(1)-O(2)             | 1.363(7)   | B(8)-O(7)#3         | 1.489(7)   |
| B(1)-O(3)             | 1.388(7)   | B(8)-O(13)          | 1.454(7)   |
| B(2)-O(3)             | 1.382(7)   | B(8)-O(14)          | 1.439(8)   |
| B(2)-O(4)             | 1.342(7)   | B(8)-O(15)#3        | 1.464(7)   |
| B(2)-O(5)             | 1.379(8)   | B(9)-O(12)          | 1.403(7)   |
| B(3)-O(1)#7           | 1.478(7)   | B(9)-O(14)          | 1.374(8)   |
| B(3)-O(4)             | 1.450(8)   | B(9)-O(15)          | 1.344(7)   |
| O(2)#4-Li(1)-O(1)     | 146.0(7)   | O(15)-Sr(1)-O(9)#6  | 88.10(13)  |
| O(6)#1-Li(1)-O(1)     | 66.1(6)    | O(15)-Sr(1)-O(12)#3 | 122.52(12) |
| O(6)#1-Li(1)-O(2)#4   | 86.3(4)    | O(15)-Sr(1)-O(14)   | 52.16(14)  |
| O(7)#5-Li(1)-O(1)     | 100.1(5)   | O(2)-B(1)-O(1)      | 122.5(5)   |
| O(7)#5-Li(1)-O(2)#4   | 113.8(9)   | O(3)-B(1)-O(1)      | 118.5(5)   |
| O(7)#5-Li(1)-O(6)#1   | 144.9(6)   | O(3)-B(1)-O(2)      | 119.0(5)   |
| O(11)#2-Li(1)-O(1)    | 104.6(6)   | O(4)-B(2)-O(3)      | 113.4(5)   |
| O(11)#2-Li(1)-O(2)#4  | 68.0(4)    | O(5)-B(2)-O(3)      | 119.4(6)   |
| O(11)#2-Li(1)-O(6)#1  | 114.3(5)   | O(5)-B(2)-O(4)      | 127.2(6)   |
| O(11)#2-Li(1)-O(7)#5  | 100.2(6)   | O(4)-B(3)-O(1)#7    | 110.0(5)   |
| O(13)#3-Li(1)-O(1)    | 107.4(6)   | O(6)-B(3)-O(1)#7    | 105.3(5)   |
| O(13)#3-Li(1)-O(2)#4  | 88.5(5)    | O(6)-B(3)-O(4)      | 111.4(5)   |
| O(13)#3-Li(1)-O(6)#1  | 85.2(4)    | O(9)-B(3)-O(1)#7    | 110.1(5)   |
| O(13)#3-Li(1)-O(7)#5  | 67.8(4)    | O(9)-B(3)-O(4)      | 109.5(5)   |
| O(13)#3-Li(1)-O(11)#2 | 147.2(10)  | O(9)-B(3)-O(6)      | 110.4(5)   |
| O(4)#1-Sr(1)-O(3)#1   | 48.87(12)  | O(7)-B(4)-O(6)      | 118.2(5)   |
| O(5)#6-Sr(1)-O(3)#1   | 91.58(13)  | O(8)-B(4)-O(6)      | 119.9(5)   |
| O(5)#6-Sr(1)-O(4)#1   | 97.35(13)  | O(8)-B(4)-O(7)      | 121.8(5)   |
| O(8)#3-Sr(1)-O(3)#1   | 172.12(13) | O(9)-B(5)-O(8)      | 119.6(6)   |
| O(8)#3-Sr(1)-O(4)#1   | 133.46(12) | O(10)-B(5)-O(8)     | 124.3(6)   |
| O(8)#3-Sr(1)-O(5)#6   | 80.72(13)  | O(10)-B(5)-O(9)     | 115.9(5)   |
| O(9)#6-Sr(1)-O(3)#1   | 67.68(13)  | O(5)#8-B(6)-O(2)#8  | 110.1(5)   |
| O(9)#6-Sr(1)-O(4)#1   | 115.35(13) | O(10)-B(6)-O(2)#8   | 107.2(5)   |

|                      |            |                     |          |
|----------------------|------------|---------------------|----------|
| O(9)#6-Sr(1)-O(5)#6  | 70.59(14)  | O(10)-B(6)-O(5)#8   | 109.7(5) |
| O(9)#6-Sr(1)-O(8)#3  | 107.77(13) | O(11)-B(6)-O(2)#8   | 105.4(5) |
| O(12)#3-Sr(1)-O(3)#1 | 121.22(13) | O(11)-B(6)-O(5)#8   | 111.0(5) |
| O(12)#3-Sr(1)-O(4)#1 | 74.71(12)  | O(11)-B(6)-O(10)    | 113.2(5) |
| O(12)#3-Sr(1)-O(5)#6 | 79.11(13)  | O(12)-B(7)-O(11)    | 120.2(5) |
| O(12)#3-Sr(1)-O(8)#3 | 59.17(12)  | O(13)-B(7)-O(11)    | 120.5(5) |
| O(12)#3-Sr(1)-O(9)#6 | 148.89(13) | O(13)-B(7)-O(12)    | 119.2(5) |
| O(14)-Sr(1)-O(3)#1   | 117.17(13) | O(13)-B(8)-O(7)#3   | 105.4(5) |
| O(14)-Sr(1)-O(4)#1   | 91.94(12)  | O(14)-B(8)-O(7)#3   | 111.4(5) |
| O(14)-Sr(1)-O(5)#6   | 147.80(14) | O(14)-B(8)-O(13)    | 111.2(4) |
| O(14)-Sr(1)-O(8)#3   | 70.70(12)  | O(15)#3-B(8)-O(7)#3 | 109.3(4) |
| O(14)-Sr(1)-O(9)#6   | 131.80(14) | O(15)#3-B(8)-O(13)  | 109.4(5) |
| O(14)-Sr(1)-O(12)#3  | 73.74(14)  | O(15)#3-B(8)-O(14)  | 110.0(5) |
| O(15)-Sr(1)-O(3)#1   | 76.06(13)  | O(14)-B(9)-O(12)    | 119.5(5) |
| O(15)-Sr(1)-O(4)#1   | 87.94(12)  | O(15)-B(9)-O(12)    | 125.6(5) |
| O(15)-Sr(1)-O(5)#6   | 158.30(13) | O(15)-B(9)-O(14)    | 114.9(5) |
| O(15)-Sr(1)-O(8)#3   | 110.70(12) |                     |          |

---

Symmetry transformations used to generate equivalent atoms:

#1  $x, y-1, z$  #2  $-x+1/2, -y+1, z-1/2$  #3  $x+1/2, -y+1/2, -z+1$  #4  $-x+1, y-1/2, -z+3/2$   
#5  $x+1/2, -y+3/2, -z+1$  #6  $x+1, y, z$  #7  $x-1/2, -y+3/2, -z+1$  #8  $-x, y+1/2, -z+3/2$   
#9  $x-1, y, z$  #10  $-x+1/2, -y+1, z+1/2$  #11  $-x+1, y+1/2, -z+3/2$  #12  $-x, y-1/2, -z+3/2$   
#13  $x-1/2, -y+1/2, -z+1$  #14  $x, y+1, z$

**Table S4.** Selected bond lengths [Å] and angles [deg.] for  $\alpha$ -LiPbB<sub>9</sub>O<sub>15</sub>.

|                     |            |                      |            |
|---------------------|------------|----------------------|------------|
| Li(1)-O(3)#1        | 1.938(12)  | Pb(1)-O(4)#10        | 2.716(3)   |
| Li(1)-O(3)          | 1.938(12)  | B(1)-O(5)#11         | 1.445(5)   |
| Li(1)-O(3)#2        | 1.938(12)  | B(1)-O(1)#5          | 1.458(6)   |
| Li(1)-O(1)#3        | 2.220(15)  | B(1)-O(3)            | 1.458(6)   |
| Li(1)-O(1)#4        | 2.220(15)  | B(1)-O(2)#5          | 1.516(5)   |
| Li(1)-O(1)#5        | 2.220(15)  | B(2)-O(1)            | 1.344(6)   |
| Pb(1)-O(2)#6        | 2.479(3)   | B(2)-O(3)            | 1.350(6)   |
| Pb(1)-O(2)#7        | 2.479(3)   | B(2)-O(4)            | 1.385(5)   |
| Pb(1)-O(2)          | 2.479(3)   | B(3)-O(5)            | 1.341(6)   |
| Pb(1)-O(4)#8        | 2.716(3)   | B(3)-O(2)            | 1.375(6)   |
| Pb(1)-O(4)#9        | 2.716(3)   | B(3)-O(4)            | 1.380(6)   |
| O(3)#1-Li(1)-O(3)   | 99.5(8)    | O(2)#6-Pb(1)-O(4)#9  | 87.89(10)  |
| O(3)#1-Li(1)-O(3)#2 | 99.5(8)    | O(2)#7-Pb(1)-O(4)#9  | 146.93(10) |
| O(3)-Li(1)-O(3)#2   | 99.5(8)    | O(2)-Pb(1)-O(4)#9    | 74.61(9)   |
| O(3)#1-Li(1)-O(1)#3 | 114.88(19) | O(4)#8-Pb(1)-O(4)#9  | 114.06(6)  |
| O(3)-Li(1)-O(1)#3   | 144.4(3)   | O(2)#6-Pb(1)-O(4)#10 | 146.93(10) |
| O(3)#2-Li(1)-O(1)#3 | 67.14(16)  | O(2)#7-Pb(1)-O(4)#10 | 74.61(9)   |
| O(3)#1-Li(1)-O(1)#4 | 67.14(16)  | O(2)-Pb(1)-O(4)#10   | 87.89(10)  |
| O(3)-Li(1)-O(1)#4   | 114.88(19) | O(4)#8-Pb(1)-O(4)#10 | 114.06(6)  |
| O(3)#2-Li(1)-O(1)#4 | 144.4(3)   | O(4)#9-Pb(1)-O(4)#10 | 114.06(6)  |
| O(1)#3-Li(1)-O(1)#4 | 88.1(7)    | O(5)#11-B(1)-O(1)#5  | 111.6(4)   |
| O(3)#1-Li(1)-O(1)#5 | 144.4(3)   | O(5)#11-B(1)-O(3)    | 109.6(3)   |
| O(3)-Li(1)-O(1)#5   | 67.14(16)  | O(1)#5-B(1)-O(3)     | 104.8(3)   |
| O(3)#2-Li(1)-O(1)#5 | 114.88(19) | O(5)#11-B(1)-O(2)#5  | 108.8(3)   |
| O(1)#3-Li(1)-O(1)#5 | 88.1(7)    | O(1)#5-B(1)-O(2)#5   | 110.1(3)   |
| O(1)#4-Li(1)-O(1)#5 | 88.1(7)    | O(3)-B(1)-O(2)#5     | 112.1(4)   |
| O(2)#6-Pb(1)-O(2)#7 | 73.92(10)  | O(1)-B(2)-O(3)       | 121.8(4)   |
| O(2)#6-Pb(1)-O(2)   | 73.92(10)  | O(1)-B(2)-O(4)       | 119.2(4)   |
| O(2)#7-Pb(1)-O(2)   | 73.92(10)  | O(3)-B(2)-O(4)       | 118.9(4)   |
| O(2)#6-Pb(1)-O(4)#8 | 74.61(9)   | O(5)-B(3)-O(2)       | 124.2(4)   |
| O(2)#7-Pb(1)-O(4)#8 | 87.89(10)  | O(5)-B(3)-O(4)       | 116.1(4)   |
| O(2)-Pb(1)-O(4)#8   | 146.93(10) | O(2)-B(3)-O(4)       | 119.7(4)   |

Symmetry transformations used to generate equivalent atoms:

#1 -y+2,x-y+1,z #2 -x+y+1,-x+2,z #3 -x+2,-y+2,z+1/2

#4 x-y+1,x,z+1/2 #5 y,-x+y+1,z+1/2 #6 -x+y+1,-x+1,z

#7 -y+1,x-y,z #8 y,-x+y,z-1/2 #9 x-y+1,x,z-1/2

#10 -x+1,-y+1,z-1/2 #11 -x+1,-y+1,z+1/2 #12 -x+2,-y+2,z-1/2



**Figure S1.** The coordination polyhedra of cations for (a, b)  $\alpha$ -LiSrB<sub>9</sub>O<sub>15</sub>, (c, d)  $\alpha$ -LiPbB<sub>9</sub>O<sub>15</sub>, (e, f)  $\beta$ -LiSrB<sub>9</sub>O<sub>15</sub> and (g, h)  $\beta$ -LiPbB<sub>9</sub>O<sub>15</sub>.

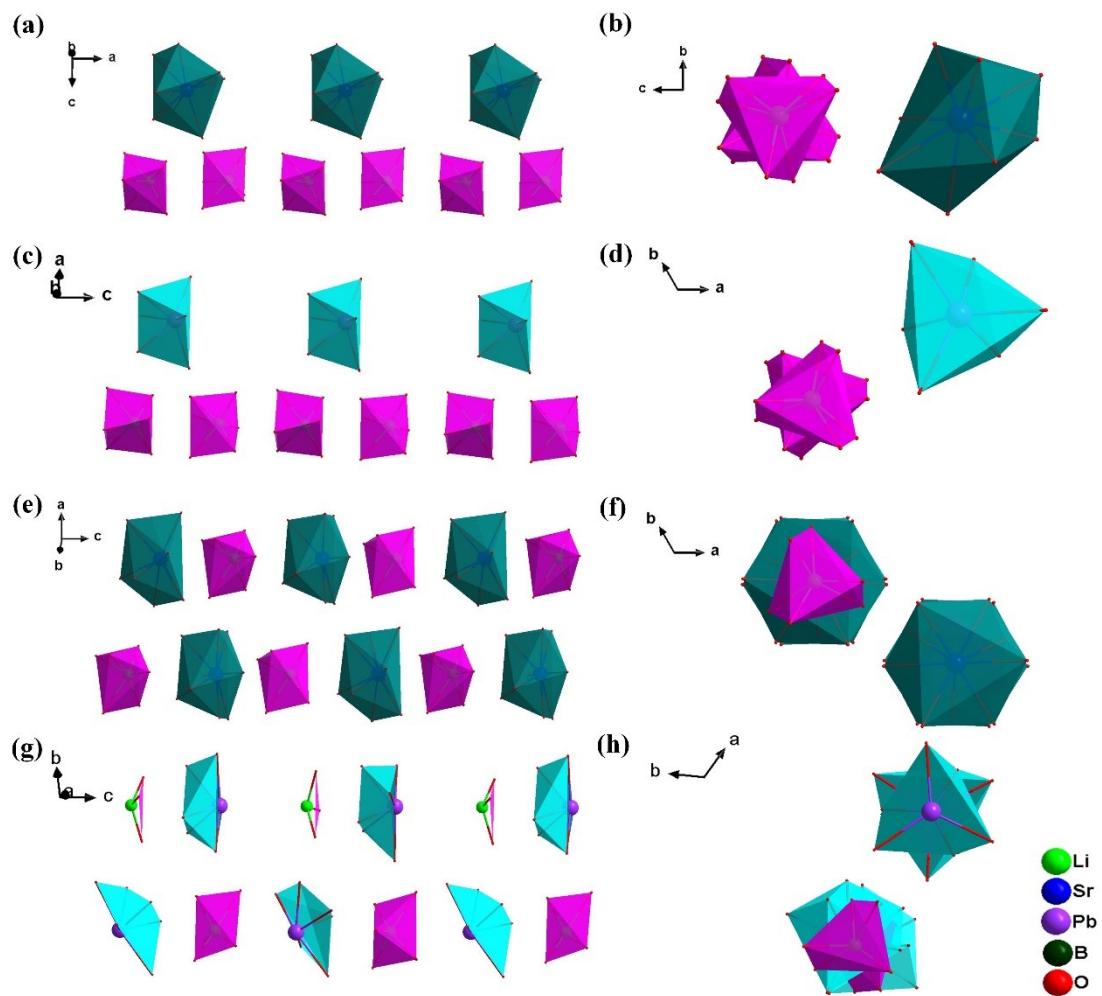

**Figure S2.** The FBUs connection mode of (a, c)  $\alpha$ -LiMB<sub>9</sub>O<sub>15</sub> (M = Sr, Pb) and (c, d)  $\beta$ -LiMB<sub>9</sub>O<sub>15</sub> (M = Sr, Pb).

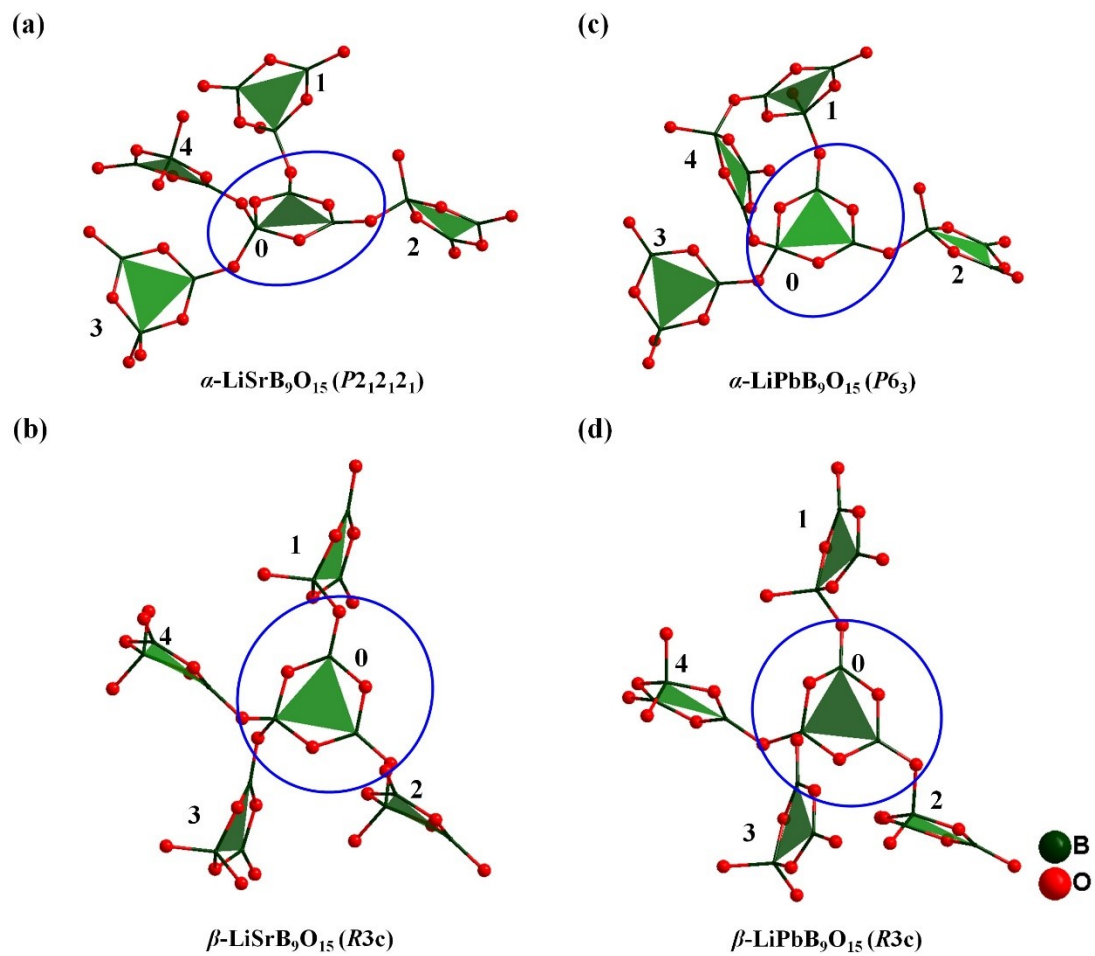

**Table S5.** The angles between the central plane (0) and surrounding four planes (1-4) constructed by three B atoms of [B<sub>3</sub>O<sub>7</sub>] groups for  $\alpha$ -LiSrB<sub>9</sub>O<sub>15</sub>,  $\alpha$ -LiPbB<sub>9</sub>O<sub>15</sub>,  $\beta$ -LiSrB<sub>9</sub>O<sub>15</sub>, and  $\beta$ -LiPbB<sub>9</sub>O<sub>15</sub>.

|             | $\alpha$ -LiSrB <sub>9</sub> O <sub>15</sub> | $\alpha$ -LiPbB <sub>9</sub> O <sub>15</sub> | $\beta$ -LiSrB <sub>9</sub> O <sub>15</sub> | $\beta$ -LiPbB <sub>9</sub> O <sub>15</sub> |
|-------------|----------------------------------------------|----------------------------------------------|---------------------------------------------|---------------------------------------------|
| $\angle 01$ | 80.400 °                                     | 86.872 °                                     | 81.406 °                                    | 85.628 °                                    |
| $\angle 02$ | 54.542 °                                     | 86.872 °                                     | 79.679 °                                    | 73.997 °                                    |
| $\angle 03$ | 50.901 °                                     | 49.573 °                                     | 81.406 °                                    | 86.635 °                                    |
| $\angle 04$ | 45.439 °                                     | 49.573 °                                     | 79.679 °                                    | 85.061 °                                    |

**Table S6.** Frameworks and FBUs of the known B<sub>3</sub>O<sub>5</sub>/B<sub>6</sub>O<sub>10</sub>/B<sub>18</sub>O<sub>30</sub> class borates.

| Compounds                                                                       | Space groups                                    | FBU                                                                                           | Anionic framework                                            | CCDC   |
|---------------------------------------------------------------------------------|-------------------------------------------------|-----------------------------------------------------------------------------------------------|--------------------------------------------------------------|--------|
| RbB <sub>3</sub> O <sub>5</sub> <sup>7</sup>                                    | <i>P2<sub>1</sub>2<sub>1</sub>2<sub>1</sub></i> | [B <sub>3</sub> O <sub>7</sub> ]                                                              | <sup>3</sup> [B <sub>3</sub> O <sub>5</sub> ] <sub>∞</sub>   | 91545  |
| TlB <sub>3</sub> O <sub>5</sub> <sup>8</sup>                                    | <i>P2<sub>1</sub>2<sub>1</sub>2<sub>1</sub></i> | [B <sub>3</sub> O <sub>7</sub> ]                                                              | <sup>3</sup> [B <sub>3</sub> O <sub>5</sub> ] <sub>∞</sub>   | 84855  |
| Cs <sub>2</sub> B <sub>6</sub> O <sub>10</sub> <sup>9</sup>                     | <i>P2<sub>1</sub>2<sub>1</sub>2<sub>1</sub></i> | [B <sub>3</sub> O <sub>7</sub> ]                                                              | <sup>3</sup> [B <sub>3</sub> O <sub>5</sub> ] <sub>∞</sub>   | 2081   |
| KB <sub>3</sub> O <sub>5</sub> <sup>10</sup>                                    | <i>P2<sub>1</sub>/c</i>                         | [B <sub>3</sub> O <sub>7</sub> ]                                                              | <sup>3</sup> [B <sub>3</sub> O <sub>5</sub> ] <sub>∞</sub>   | 250224 |
| HP-TlB <sub>3</sub> O <sub>5</sub> <sup>11</sup>                                | <i>C2/c</i>                                     | [B <sub>3</sub> O <sub>8</sub> ]                                                              | <sup>3</sup> [B <sub>3</sub> O <sub>5</sub> ] <sub>∞</sub>   | 427689 |
| HP-RbB <sub>3</sub> O <sub>5</sub> <sup>12</sup>                                | <i>C2/c</i>                                     | [B <sub>3</sub> O <sub>8</sub> ]                                                              | <sup>3</sup> [B <sub>3</sub> O <sub>5</sub> ] <sub>∞</sub>   | 424931 |
| HP-KB <sub>3</sub> O <sub>5</sub> <sup>13</sup>                                 | <i>C2/c</i>                                     | [B <sub>3</sub> O <sub>8</sub> ]                                                              | <sup>3</sup> [B <sub>3</sub> O <sub>5</sub> ] <sub>∞</sub>   | 423027 |
| AgB <sub>3</sub> O <sub>5</sub>                                                 | <i>Pna2<sub>1</sub></i>                         | [B <sub>3</sub> O <sub>7</sub> ], [B <sub>3</sub> O <sub>8</sub> ]                            | <sup>3</sup> [B <sub>3</sub> O <sub>5</sub> ] <sub>∞</sub>   | 428142 |
| LiB <sub>3</sub> O <sub>5</sub> <sup>14</sup>                                   | <i>Pna2<sub>1</sub></i>                         | [B <sub>3</sub> O <sub>7</sub> ]                                                              | <sup>3</sup> [B <sub>3</sub> O <sub>5</sub> ] <sub>∞</sub>   | 1585   |
| LiB <sub>3</sub> O <sub>5</sub> <sup>15</sup>                                   | <i>Pnma</i>                                     | [BO <sub>4</sub> ], [B <sub>2</sub> O <sub>5</sub> ]                                          | <sup>3</sup> [B <sub>3</sub> O <sub>5</sub> ] <sub>∞</sub>   | 422922 |
| CaB <sub>6</sub> O <sub>10</sub> <sup>16</sup>                                  | <i>P2<sub>1</sub>/c</i>                         | [B <sub>3</sub> O <sub>7</sub> ]                                                              | <sup>3</sup> [B <sub>3</sub> O <sub>5</sub> ] <sub>∞</sub>   | 161320 |
| CsLiB <sub>6</sub> O <sub>10</sub> <sup>17</sup>                                | <i>P222<sub>1</sub></i>                         | [B <sub>3</sub> O <sub>7</sub> ]                                                              | <sup>3</sup> [B <sub>3</sub> O <sub>5</sub> ] <sub>∞</sub>   | 427409 |
| Na <sub>3</sub> B <sub>6</sub> O <sub>10</sub> Cl <sup>18</sup>                 | <i>P2<sub>1</sub>2<sub>1</sub>2<sub>1</sub></i> | [B <sub>6</sub> O <sub>13</sub> ]                                                             | <sup>3</sup> [B <sub>6</sub> O <sub>10</sub> ] <sub>∞</sub>  | 251537 |
| RbNa <sub>2</sub> B <sub>6</sub> O <sub>10</sub> Cl <sup>18</sup>               | <i>P2<sub>1</sub>2<sub>1</sub>2<sub>1</sub></i> | [B <sub>6</sub> O <sub>13</sub> ]                                                             | <sup>3</sup> [B <sub>6</sub> O <sub>10</sub> ] <sub>∞</sub>  | 251539 |
| RbNa <sub>2</sub> B <sub>6</sub> O <sub>10</sub> Br <sup>18</sup>               | <i>Pnma</i>                                     | [B <sub>6</sub> O <sub>13</sub> ]                                                             | <sup>3</sup> [B <sub>6</sub> O <sub>10</sub> ] <sub>∞</sub>  | 251538 |
| Na <sub>3</sub> B <sub>6</sub> O <sub>10</sub> Br <sup>19</sup>                 | <i>Pnma</i>                                     | [B <sub>6</sub> O <sub>13</sub> ]                                                             | <sup>3</sup> [B <sub>6</sub> O <sub>10</sub> ] <sub>∞</sub>  | 424557 |
| CsLiB <sub>6</sub> O <sub>10</sub> <sup>20</sup>                                | <i>I4̄2d</i>                                    | [B <sub>3</sub> O <sub>7</sub> ]                                                              | <sup>3</sup> [B <sub>3</sub> O <sub>5</sub> ] <sub>∞</sub>   | 75995  |
| K <sub>3</sub> B <sub>6</sub> O <sub>10</sub> Cl <sup>21</sup>                  | <i>R3m</i>                                      | [B <sub>6</sub> O <sub>13</sub> ]                                                             | <sup>3</sup> [B <sub>6</sub> O <sub>10</sub> ] <sub>∞</sub>  | 262005 |
| K <sub>3</sub> B <sub>6</sub> O <sub>10</sub> Br <sup>22</sup>                  | <i>R3m</i>                                      | [B <sub>6</sub> O <sub>13</sub> ]                                                             | <sup>3</sup> [B <sub>6</sub> O <sub>10</sub> ] <sub>∞</sub>  | 172400 |
| Na <sub>2</sub> B <sub>6</sub> O <sub>10</sub> <sup>23</sup>                    | <i>P2<sub>1</sub>/c</i>                         | [B <sub>5</sub> O <sub>10</sub> ], [BO <sub>4</sub> ]<br>and [B <sub>3</sub> O <sub>7</sub> ] | <sup>2</sup> [B <sub>6</sub> O <sub>10</sub> ] <sub>∞</sub>  | 2777   |
| Na <sub>2</sub> Cs <sub>2</sub> BaB <sub>18</sub> O <sub>30</sub> <sup>24</sup> | <i>P2<sub>1</sub>/c</i>                         | [B <sub>9</sub> O <sub>19</sub> ]                                                             | <sup>3</sup> [B <sub>18</sub> O <sub>30</sub> ] <sub>∞</sub> | 433333 |
| Na <sub>2</sub> Cs <sub>2</sub> PbB <sub>18</sub> O <sub>30</sub> <sup>24</sup> | <i>P2<sub>1</sub>/c</i>                         | [B <sub>9</sub> O <sub>19</sub> ]                                                             | <sup>3</sup> [B <sub>18</sub> O <sub>30</sub> ] <sub>∞</sub> | 433334 |
| Na <sub>2</sub> Rb <sub>2</sub> PbB <sub>18</sub> O <sub>30</sub> <sup>24</sup> | <i>P2<sub>1</sub>/c</i>                         | [B <sub>9</sub> O <sub>19</sub> ]                                                             | <sup>3</sup> [B <sub>18</sub> O <sub>30</sub> ] <sub>∞</sub> | 433335 |
| Na <sub>2</sub> Cs <sub>2</sub> SrB <sub>18</sub> O <sub>30</sub> <sup>25</sup> | <i>P2<sub>1</sub>/c</i>                         | [B <sub>9</sub> O <sub>19</sub> ]                                                             | <sup>3</sup> [B <sub>18</sub> O <sub>30</sub> ] <sub>∞</sub> | 193498 |
| Na <sub>2</sub> Rb <sub>2</sub> SrB <sub>18</sub> O <sub>30</sub> <sup>26</sup> | <i>P2<sub>1</sub>/c</i>                         | [B <sub>9</sub> O <sub>19</sub> ]                                                             | <sup>3</sup> [B <sub>18</sub> O <sub>30</sub> ] <sub>∞</sub> |        |

**Figure S3.** The IR spectra of (a)  $\alpha$ -LiSrB<sub>9</sub>O<sub>15</sub> and (b)  $\beta$ -LiSrB<sub>9</sub>O<sub>15</sub>.

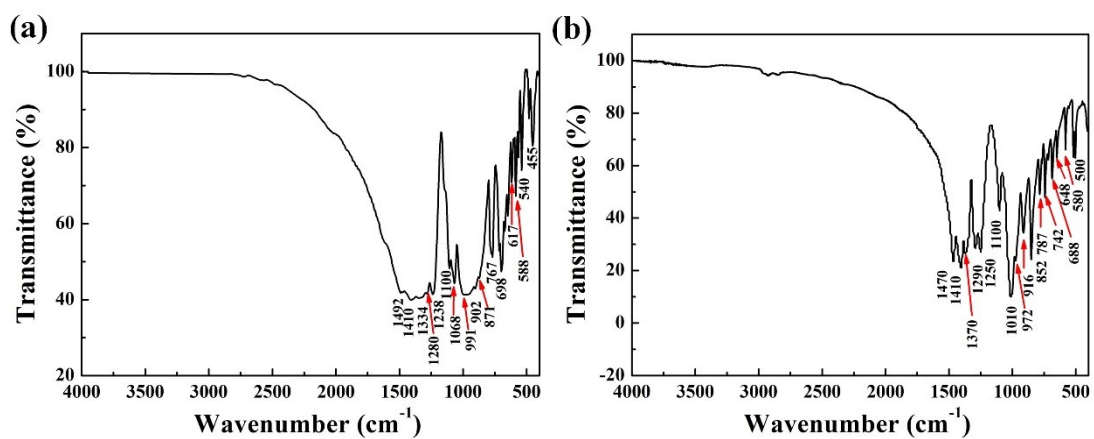

**Figure S4.** UV-vis-NIR diffuse reflectance spectra of (a)  $\alpha$ -LiSrB<sub>9</sub>O<sub>15</sub> and (b)  $\beta$ -LiSrB<sub>9</sub>O<sub>15</sub>.

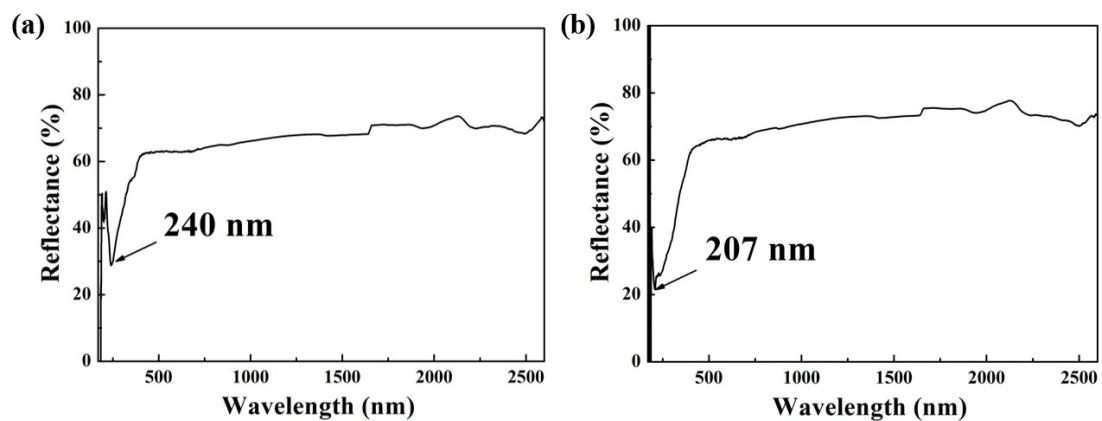

**Table S7.** Comparison of observed IR absorption peaks ( $\text{cm}^{-1}$ ) of  $\alpha$ - $\text{LiSrB}_9\text{O}_{15}$  and  $\beta$ - $\text{LiSrB}_9\text{O}_{15}$  with literature assignments.

| <b>Mode description</b>                                                           | <b><math>\alpha</math>-<math>\text{LiSrB}_9\text{O}_{15}</math></b> | <b><math>\beta</math>-<math>\text{LiSrB}_9\text{O}_{15}</math></b> |
|-----------------------------------------------------------------------------------|---------------------------------------------------------------------|--------------------------------------------------------------------|
| <b>Asymmetric stretching of B-O in the <math>[\text{BO}_3]</math></b>             | 1492, 1410, 1334,<br>1238, 1100                                     | 1470, 1410, 1370,<br>1290, 1250, 1100                              |
| <b>Asymmetric stretching of B-O in the <math>[\text{BO}_4]</math></b>             | 1060                                                                | 1010                                                               |
| <b>Symmetric stretching of B-O in the <math>[\text{BO}_3]</math></b>              | 991, 902                                                            | 972, 916                                                           |
| <b>Symmetric stretching of B-O in the <math>[\text{BO}_4]</math></b>              | 871                                                                 | 852                                                                |
| <b>Bending vibrations of B-O in the <math>[\text{BO}_3]</math></b>                | 767, 698, 617                                                       | 742, 720, 688                                                      |
| <b>Symmetric pulse vibration of the <math>[\text{BO}_3]</math></b>                | 588                                                                 | 580                                                                |
| <b>Bending modes of <math>[\text{BO}_4]</math> and <math>[\text{BO}_3]</math></b> | 540, 455                                                            | 500                                                                |

Figure S5. Band structures (a) and PDOS (b) of  $\alpha$ -LiPbB<sub>9</sub>O<sub>15</sub>.

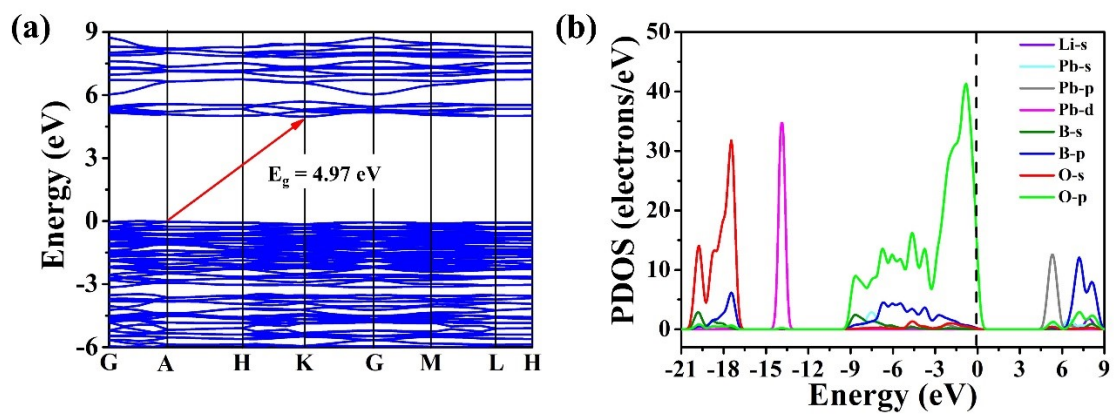



Figure S6. The  $[\text{BO}_3]$  triangles arrangements of (a, b, c)  $\alpha$ - and (d, e, f)  $\beta$ - $\text{LiSrB}_9\text{O}_{15}$  from different orientations.

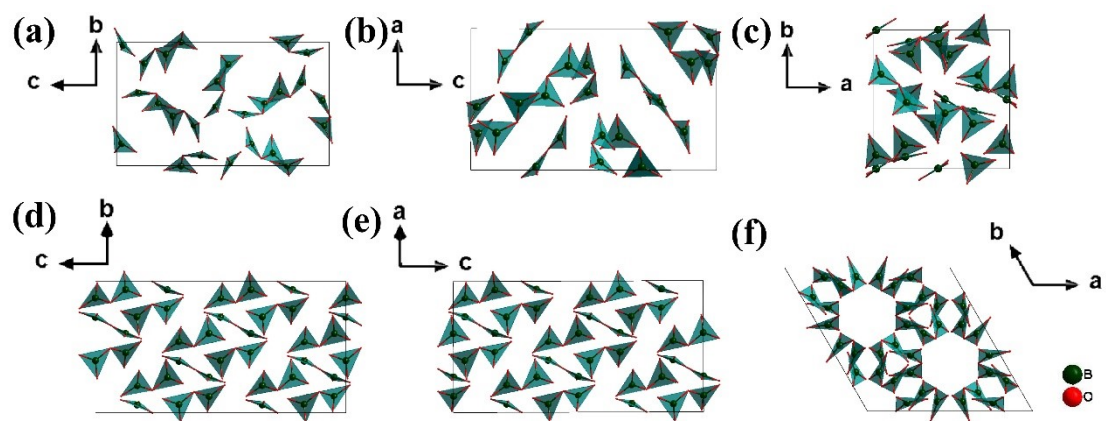

## Uncategorized References

1. G. Sheldrick, SHELXT - Integrated Space-Group and Crystal-Structure Determination, *Acta Crystallogr. A*, 2015, **71**, 3-8.
2. A. L. Spek, Single-Crystal Structure Validation with the Program PLATON, *J. Appl. Crystallogr.*, 2003, **36**, 7-13.
3. S. J. Clark, M. D. Segall, C. J. Pickard, P. J. Hasnip, M. J. Probert, K. Refson and M. C. Payne, First-Principles Methods Using CASTEP, *Z. Kristallogr. - Cryst. Mater.*, 2005, **220**, 567-570.
4. J. P. Perdew, K. Burke and M. Ernzerhof, Generalized Gradient Approximation Made Simple, *Phys. Rev. Lett.*, 1996, **77**, 3865-3868.
5. A. M. Rappe, K. M. Rabe, E. Kaxiras and J. D. Joannopoulos, Optimized pseudopotentials, *Phys. Rev. B*, 1990, **41**, 1227.
6. J. S. Lin, A. Qteish, M. C. Payne and V. Heine, Optimized and Transferable Nonlocal Separable *ab Initio* Pseudopotentials, *Phys. Rev. B*, 1993, **47**, 4174-4180.
7. M. G. Krzhizhanovskaya, Y. K. Kabalov, R. S. Bubnova, E. V. Sokolova and S. K. Filatov, Crystal Structure of the Low Temperature Modification  $\alpha$ -(RbB<sub>3</sub>O<sub>5</sub>), *Kristallogr.*, 2000, **45**, 629-634.
8. M. Touboul, E. Bétourné and G. Nowogrocki, Crystal Structure of Thallium Triborate, TlB<sub>3</sub>O<sub>5</sub>, *J. Solid State Chem.*, 1997, **131**, 370-373.
9. J. Krogh-Moe, Refinement of the Crystal Structure of Caesium Triborate, Cs<sub>2</sub>O.3B<sub>2</sub>O<sub>3</sub>, *Acta Crystallogr. B*, 1974, **30**, 1178-1180.
10. R. S. Bubnova, V. S. Fundamenskii, S. K. Filatov and I. G. Polyakova, Crystal Structure and Thermal Behavior of KB<sub>3</sub>O<sub>5</sub>, *Dokl. Phys. Chem.*, 2004, **398**, 249-253.
11. G. Sohr, L. Perfler and H. Huppertz, The High-Pressure Thallium Triborate HP-TlB<sub>3</sub>O<sub>5</sub>, *Z. Naturforsch. B*, 2014, **69**, 1260-1268.
12. G. Sohr, S. C. Neumair and H. Huppertz, High-Pressure Synthesis and Characterization of the Alkali Metal Borate HP-RbB<sub>3</sub>O<sub>5</sub>, *Z. Naturforsch. B*, 2012, **67**, 1197-1204.
13. S. C. Neumair, S. Vanicek, R. Kaindl, D. M. Többens, C. Martineau, F. Taulelle, J. Senker and H. Huppertz, HP-KB<sub>3</sub>O<sub>5</sub> Highlights the Structural Diversity of Borates: Corner-Sharing BO<sub>3</sub>/BO<sub>4</sub> Groups in Combination with Edge-Sharing BO<sub>4</sub> Tetrahedra, *Eur. J. Inorg. Chem.*, 2011, **2011**, 4147-4152.
14. H. König and R. Hoppe, Über Borate der Alkalimetalle. II. Zur Kenntnis von LiB<sub>3</sub>O<sub>5</sub> [1], *Z. Anorg. Allg. Chem.*, 1978, **439**, 71-79.
15. S. C. Neumair, S. Vanicek, R. Kaindl, D. M. Többens, K. Wurst and H. Huppertz, High-Pressure Synthesis and Crystal Structure of the Lithium Borate HP-LiB<sub>3</sub>O<sub>5</sub>, *J. Solid State Chem.*, 2011, **184**, 2490-2497.
16. X. Chen, M. Li, X. Chang, H. Zang and W. Xiao, Synthesis and Crystal Structure of a New Calcium Borate, CaB<sub>6</sub>O<sub>10</sub>, *J. Alloys Compd.*, 2008, **464**, 332-336.
17. N. A. Sennova, G. Cordier, B. Albert, S. K. Filatov, R. S. Bubnova, L. I. Isaenko, L. I. Gubenko, J.-P. Klöckner and M. H. Prosenc, Temperature- and Moisture-Dependency of CsLiB<sub>6</sub>O<sub>10</sub>. A New Phase,  $\beta$ -CsLiB<sub>6</sub>O<sub>10</sub>, *Z. Kristallogr. - Cryst. Mater.*, 2014, **229**, 741-751.
18. C. Y. Bai, H. W. Yu, S. J. Han, S. L. Pan, B. B. Zhang, Y. Wang, H. P. Wu and Z. H. Yang, Effect of Halogen (Cl, Br) on the Symmetry of Flexible Perovskite-Related Framework, *Inorg. Chem.*, 2014, **53**, 11213-11220.
19. Z. H. Chen, S. L. Pan, X. Y. Dong, Z. H. Yang, M. Zhang and X. Su, Exploration of a New

- Compound in the M–B–O–X (M: Alkali Metals; X: Halogen) System: Preparation, Crystal and Electronic Structures, and Optical Properties of  $\text{Na}_3\text{B}_6\text{O}_{10}\text{Br}$ , *Inorg. Chim. Acta*, 2013, **406**, 205-210.
20. J.-M. Tu and D. A. Keszler,  $\text{CsLiB}_6\text{O}_{10}$ : A Noncentrosymmetric Polyborate, *Mater. Res. Bull.*, 1995, **30**, 209-215.
  21. H. P. Wu, S. L. Pan, K. R. Poeppelmeier, H. Y. Li, D. Z. Jia, Z. H. Chen, X. Y. Fan, Y. Yang, J. M. Rondinelli and H. S. Luo,  $\text{K}_3\text{B}_6\text{O}_{10}\text{Cl}$ : A New Structure Analogous to Perovskite with a Large Second Harmonic Generation Response and Deep UV Absorption Edge, *J. Am. Chem. Soc.*, 2011, **133**, 7786-7790.
  22. A. G. Al'-Ama, E. L. Belokoneva, S. Y. Stefanovich, O. V. Dimitrova and N. N. Mochonova, Potassium Bromo-Borate  $\text{K}_3[\text{B}_6\text{O}_{10}]\text{Br}$  - a New Nonlinear Optical Material, *Kristallogr.*, 2004 254-258.
  23. J. Krogh-Moe, The Crystal Structure of a Sodium Triborate Modification,  $\beta\text{-Na}_2\text{O}\cdot 3\text{B}_2\text{O}_3$ , *Acta Crystallogr. B*, **28**, 1571-1576.
  24. M. Mutailipu, M. Zhang, X. Su, Z. H. Yang, Y. N. Chen and S. L. Pan, Structural Insights into Borates with an Anion-Templated Open-Framework Configuration: Asymmetric  $\text{K}_2\text{BaB}_{16}\text{O}_{26}$  versus Centrosymmetric  $\text{K}_3\text{CsB}_{20}\text{O}_{32}$  and  $\text{Na}_2\text{M}_2\text{NB}_{18}\text{O}_{30}$  (M=Rb, Cs; N=Ba, Pb), *Chem. Eur. J.*, 2017, **23**, 13910-13918.
  25. X. A. Chen, L. Wu, K. Wang, X. A. Chang and W. Q. Xiao, Synthesis and Characterization of a New Quaternary Borate  $\text{Na}_2\text{Cs}_2\text{Sr}(\text{B}_9\text{O}_{15})_2$  with the Unprecedented  $[\text{B}_9\text{O}_{19}]^{11-}$  Group, Notation of  $3\times(3:2\Delta+T)$ , *J. Alloys Compd.*, 2015, **623**, 157-163.
  26. J. J. Zheng, T. Zhang, J. W. Feng, D. H. An, C. Y. Bai and Y. Sun,  $\text{Na}_2\text{Rb}_2\text{SrB}_{18}\text{O}_{30}$  with  $[\text{B}_9\text{O}_{19}]^{11-}$  Fundamental Building Block Consisting of Three  $[\text{B}_3\text{O}_7]^{5-}$  Groups, *Z. Anorg. Allg. Chem.*, 2021, **647**, 1578-1582.
